# Supplementary material
Source: Springer Nature journal article supplement (https://www.springerprofessional.de/resource/supplementary/13173_2013_9_MOESM8_ESM.pdf/11897010)

## Analysis of keywords to content of the group5 ?

Range of content publication: 2002-01-14 a 2002-05-11

Number of content: 12300

Range of logs: 2002-01-28 a 2002-05-11

Number of accesses: 10326

Number of searching: 345

Number of users: 6235

Date: 2002-05-11

Content: group5

Meta Data Field: keyword

## General Analysis

|  | All Content                |         | Content last month |         | Content last week |         |
|--|----------------------------|---------|--------------------|---------|-------------------|---------|
|  | Minimum                    | Maximum | Minimum            | Maximum | Minimum           | Maximum |
|  | Length of meta-data II - ? | 1       | 5                  | 1       | 3                 | 1       |

## Evolution of the Metric

All Content

New Content

Last month

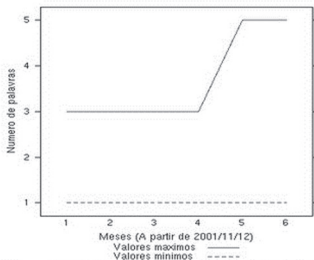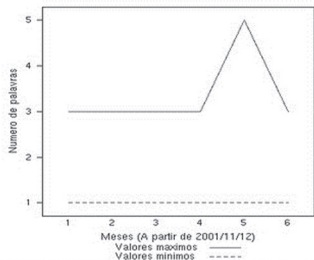

Supplement: MOESM8 [file 11897010]
